# Supplementary material for: Characterization of Growth Hormone Resistance in Experimental and Ulcerative Colitis
Source: MDPI journal article supplement (doi:10.3390/ijms18102046), 2017-09-23
Supplement: s1 [file s1]

## Supplementary Materials

### a) Probe validation for ISH, HEK cells

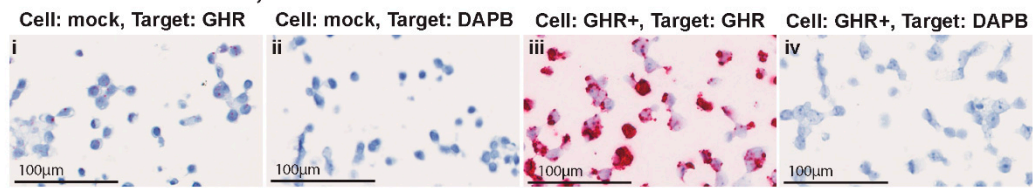

### b) GHR staining, mRNA and protein

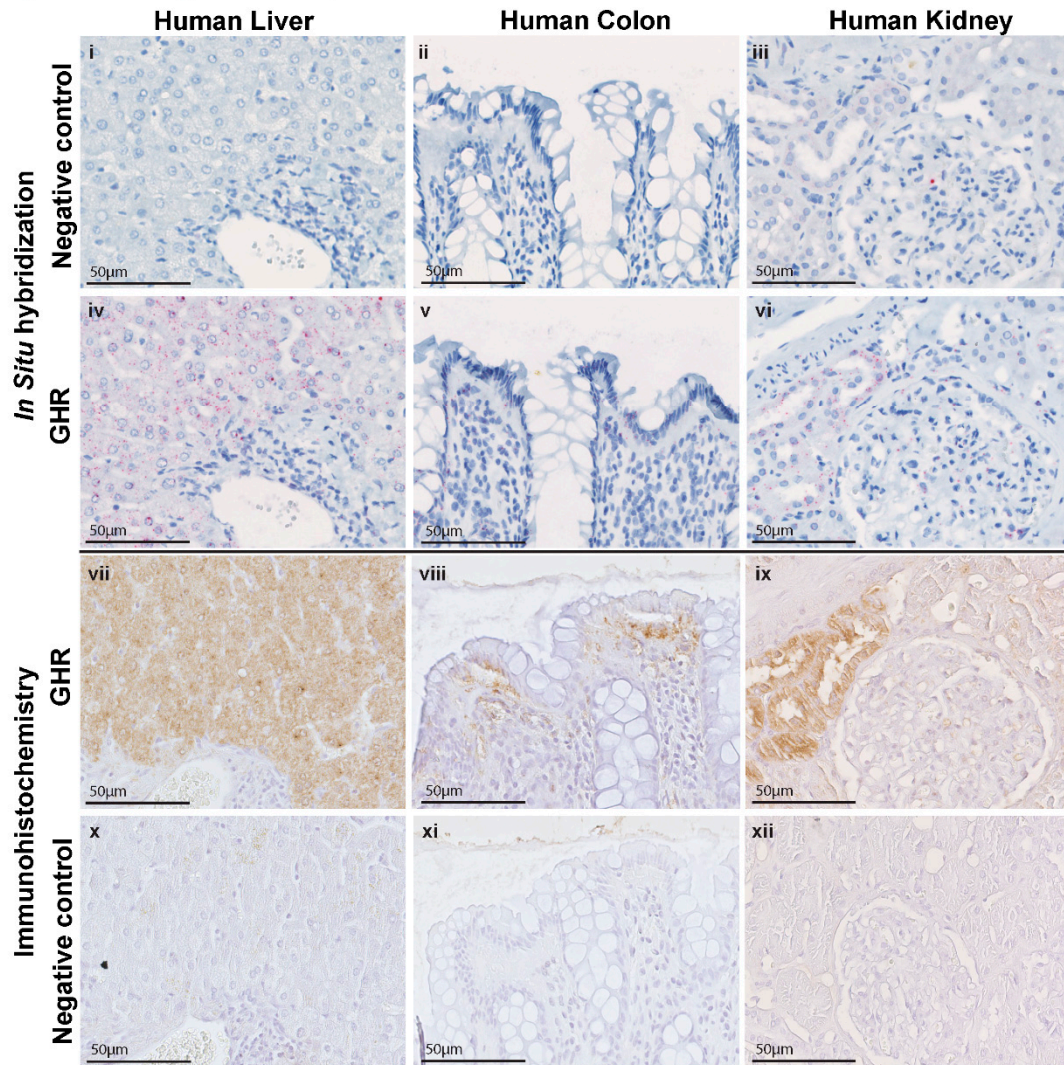

**Figure S1.** Validation of ISH and IHC for detection of GHR transcript and protein. **(a)** Validation of ISH probes using mock-transfected (**i**, **ii**) and GHR transfected (**iii**, **iv**) HEK cells. HEK cells express endogenous GHR and are not expected to be negative for GHR transcript. Probe sets targeting hGHR (**i**, **iii**) and bacterial DAPB (**ii**, **iv**) as negative control; **(b)** Staining of human liver (**i**, **iv**, **vii**, **x**), colon (**ii**, **v**, **viii**, **xi**) and kidney (**iii**, **vi**, **ix**, **xii**) by ISH (top panel (**i-vi**)) and IHC (bottom panel (**vii-xii**)) using the ISH probes validated in **(a)** and the monoclonal antibody MAB263, respectively. IHC protocol was adapted from "J Clin Endocrinol Metab. 1995 Nov; 80(11):3361-7" including vestastain-HRP (PK-6100, Vector Labs Burlingame, CA, USA) and TSA amplification (NEL700001KT, Perkin Elmer, Skovlunde, Denmark). The two methods of staining (ISH and IHC) show overlapping patterns.

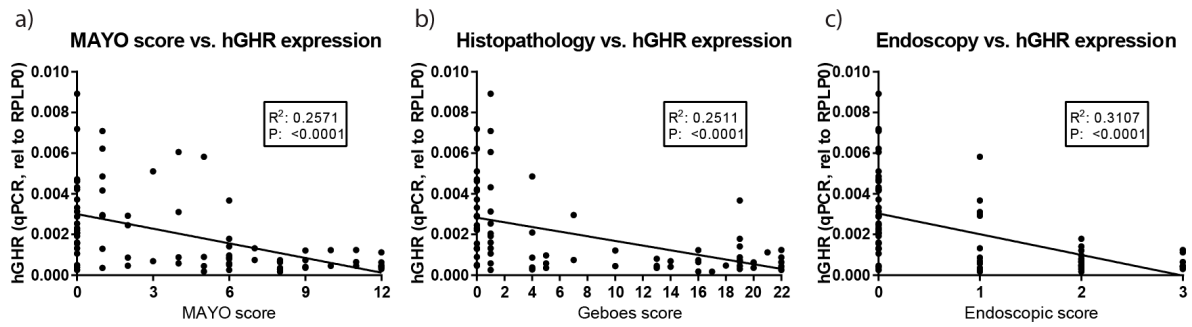

**Figure S2.** Correlation between hGHR expression and disease severity. Correlation between hGHR expression (qPCR data) and three measures of disease severity; global MAYO score, histopathological evaluation using the Geboes system and endoscopy. GHR expression correlates inversely with all of them.

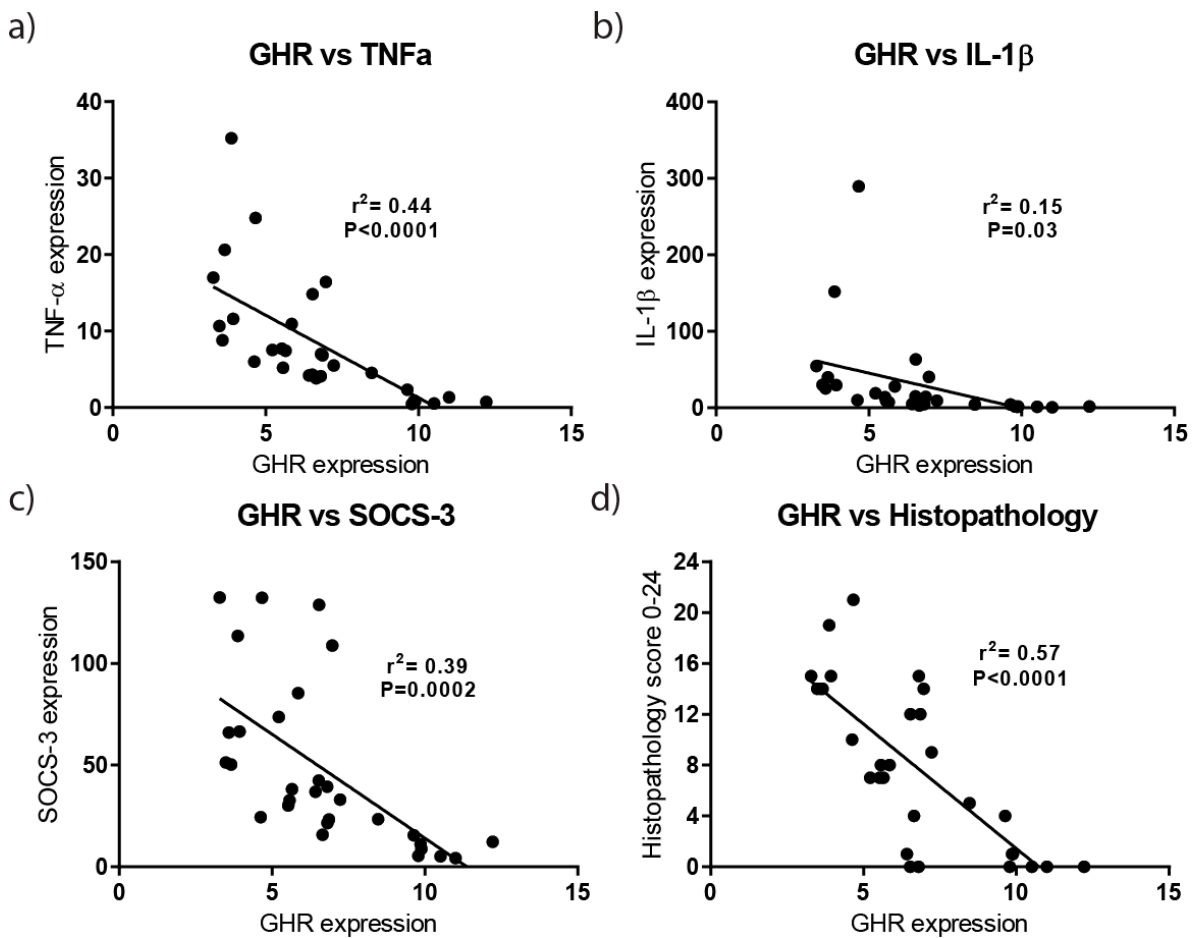

**Figure S3.** mGHR expression versus relevant gene expression and histopathology. Colonic expression of mGHR from the murine PAC model, derived from sequencing data. Correlations are shown to the local expression of TNF- $\alpha$  (a), IL-1 $\beta$  (b) and SOCS3 (c) and to the histopathological disease score (d). All four measures correlate inversely with mGHR expression.

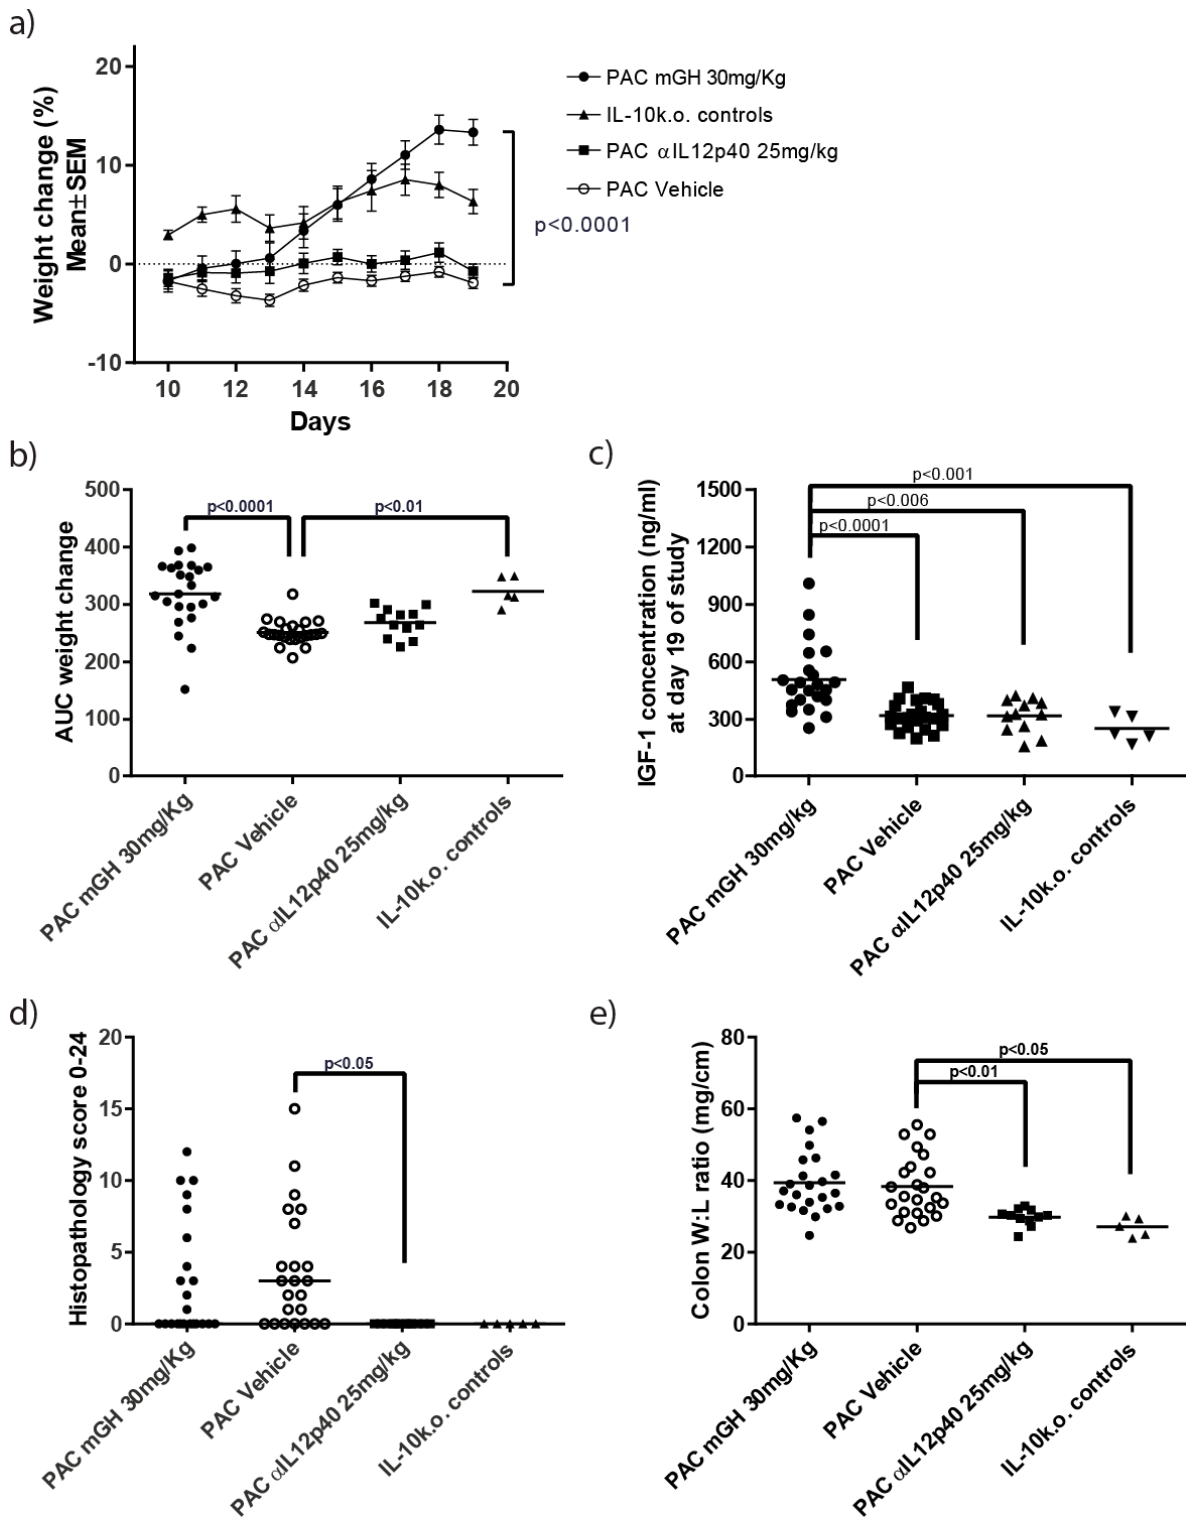

**Figure S4.** Therapeutic evaluation of the effects of twice daily mGH in the PAC model with established colitis. (a) Weight change (% relative to pre-dosing with piroxicam) during the study. The four treatment groups are indicated; (b) Area under the curve (AUC) showing the body weight for the animals in the treatment groups during the study; (c) Plasma IGF-1 at day 19 (following 9 consecutive days of mGH treatment); (d) Histopathological scoring of colonic disease severity evaluated following 10 days of mGH treatment; (e) Colonic weight:length ratio of the treated groups.
